# Supplementary material for: A superhydrophobic covalent zeolitic imidazolate framework-polyhedral oligomeric silsesquioxane hybrid material as a highly efficient and reusable sorbent for organic solvents
Source: Royal Society of Chemistry journal article supplement (doi:10.1039/d0qi01405b), 2021-01-01
Supplement: d0qi01405b1.pdf [file d0qi01405b1.pdf]

## Electronic Supplementary Information

### **A Superhydrophobic Covalent Zeolitic Imidazolate Framework-Polyhedral Oligomeric Silsesquioxane Hybrid Material as a Highly Efficient and Reusable Sorbent for Organic Solvents**

Pushparaj Loganathan, K. K. R. Datta, Swaminathan Shanmugan\*

Department of Chemistry, Faculty of Engineering and Technology, SRM Institute of Science and Technology, Kattankulathur-603203, Tamil Nadu, India.

Corresponding author: Swaminathan Shanmugan (shanmugs2@srmist.edu.in)

## Contents

Synthesis of POSS-NH<sub>2</sub>

Estimation of POSS-NH<sub>2</sub> functionalized with ZIF-90 by TG analysis.

**Figure S1.** FE-SEM images of (a) ZIF-90; (b) ZIF-POSS.

**Figure S2.** PXRD patterns of ZIF-POSS in boiled water, ethanol and hexane for 24 h.

**Figure S3.** N<sub>2</sub> isotherm for ZIF-90, inset shows the pore size distribution measured at 77 K (Blue and red circles represent adsorption and desorption, respectively).

**Figure S4.** <sup>29</sup>Si NMR spectrum of ZIF-POSS.

**Figure S5.** Photographs of water contact angle of POSS-NH<sub>2</sub>.

**Figure S6.** (a) Photographs showing the water wetting behaviour of ZIF-90 and ZIF-POSS; (b) Photographs of ZIF-POSS exposing into acidic and alkaline media.

**Figure S7.** The picture of (a) PU sponge in water and (b) ZIF-POSS@PDA@sponge on water; (c) oil droplet on surface of ZIF-POSS@PDA@sponge; (d) water droplet on surface of ZIF-POSS@PDA@sponge.

**Figure S8.** Photographs of chloroform-water separation using ZIF-POSS@PDA@sponge.

**Figure S9.** (a) Photographs of ZIF-POSS@PDA@sponge exposing to acidic, salt and alkaline media; (b) Testing selective 'chloroform' sorption for chemically treated ZIF-POSS@PDA@sponge; (c) SEM images of ZIF-POSS@PDA@sponge after exposing to acidic and alkaline media.

**Table S1.** Absorption capacities and separation efficiency of various POSS and MOF based materials.

## Synthesis of POSS-NH<sub>2</sub>

To a solution of isobutyl-T<sub>7</sub>-triol (2 g, 2.53 mmol) in dichloromethane (20 mL), 3-aminopropyltrimethoxysilane (0.5 ml, 2.79 mmol) in dichloromethane (20 mL) was added under nitrogen atmosphere at RT. The reaction mixture was stirred for 48 h, then the colourless solution evaporated under vacuum to afford colourless solid (POSS-NH<sub>2</sub>). Yield: 2.29g (90%). IR (KBr, cm<sup>-1</sup>): 3372(br), 2951(s), 2871(s), 1464(m), 1365(s), 1327(w), 1228(s), 1171(m), 1087(s), 1037(m), 954(m), 841(m), 746(s), 684(w), 557(w). <sup>1</sup>H NMR (500 MHz, CDCl<sub>3</sub>, TMS, ppm):  $\delta$  = 0.59 (t, 2H, -CH<sub>2</sub>CH<sub>2</sub>CH<sub>2</sub>NH<sub>2</sub>), 0.62(d, 14H, -CH<sub>2</sub> in *i*Bu), 0.95 (dd, 42H, -CH<sub>3</sub>), 1.53 (m, 2H, -CH<sub>2</sub>CH<sub>2</sub>CH<sub>2</sub>NH<sub>2</sub>), 1.85 (septet, 7H, -CH), 2.67 (t, 2H, -CH<sub>2</sub>CH<sub>2</sub>CH<sub>2</sub>NH<sub>2</sub>). <sup>13</sup>C NMR (100 MHz, CDCl<sub>3</sub>, TMS, ppm):  $\delta$  = 44.9, 27.3, 25.8, 24.0, 22.6, and 9.3 (aliphatic-carbons). <sup>29</sup>Si NMR (79.30 MHz, CDCl<sub>3</sub>, TMS, ppm):  $\delta$  = -67.8, -67.6, -67.2. Positive ion ESI-Mass  $m/z$  = 874.20 [POSS-NH<sub>2</sub>].

**Estimation of POSS-NH<sub>2</sub> functionalized with ZIF-90 by TG analysis:**

The residual weight wt% of ZIF-POSS

(the cage-structural POSS)

$$\frac{19.12 \text{ wt\%}}{47.5 \text{ wt\%}} = 40.25 \text{ wt\%}$$

Quantity of POSS-NH<sub>2</sub>  
functionalized with ZIF-90

The molecular weight fraction of the

cage-structural POSS in POSS-NH<sub>2</sub>

**ZIF-POSS:** ZIF = 59.75 wt%, ratio: 3

POSS = 40.25 wt%, ratio: 2

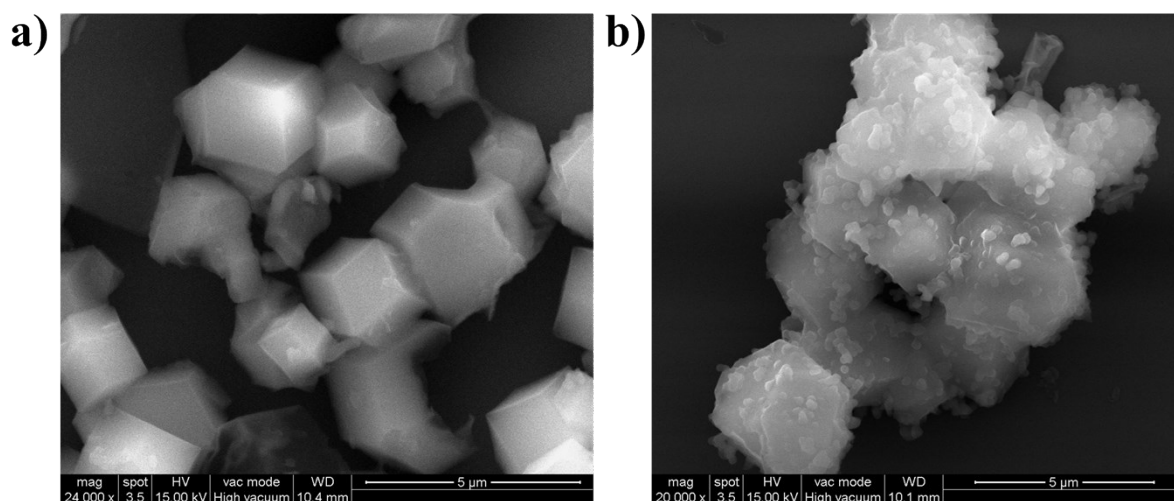

**Figure S1.** FE-SEM images of (a) ZIF-90; (b) ZIF-POSS.

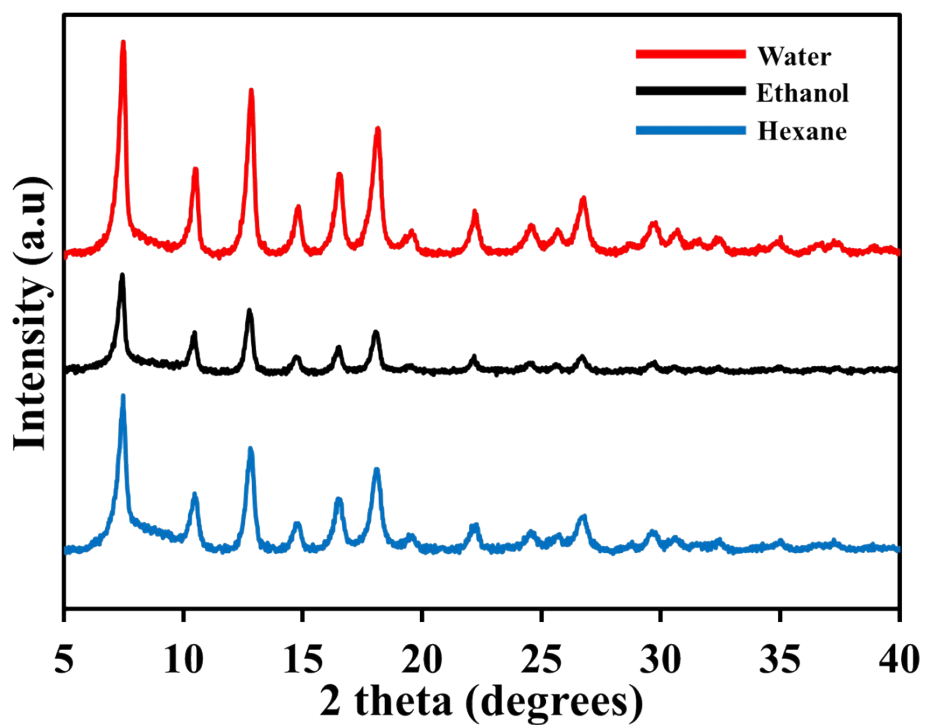

**Figure S2.** PXRD patterns of ZIF-POSS in boiled water, ethanol and hexane for 24 h.

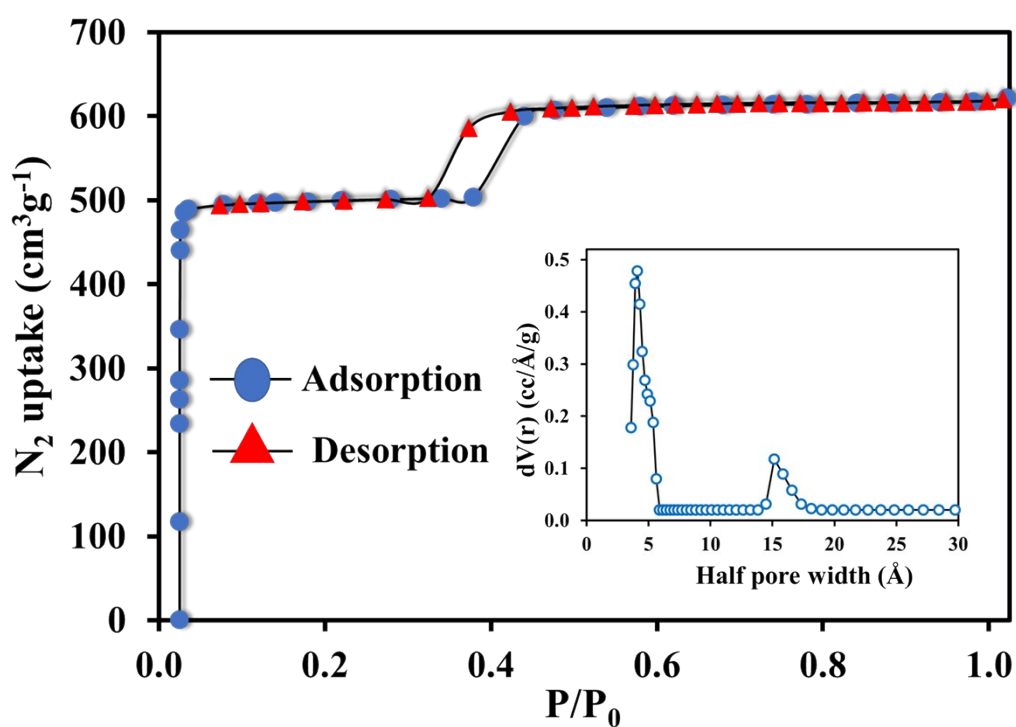

**Figure S3.** N<sub>2</sub> isotherm for ZIF-90, inset shows the pore size distribution measured at 77 K (Blue and red circles represent adsorption and desorption, respectively).

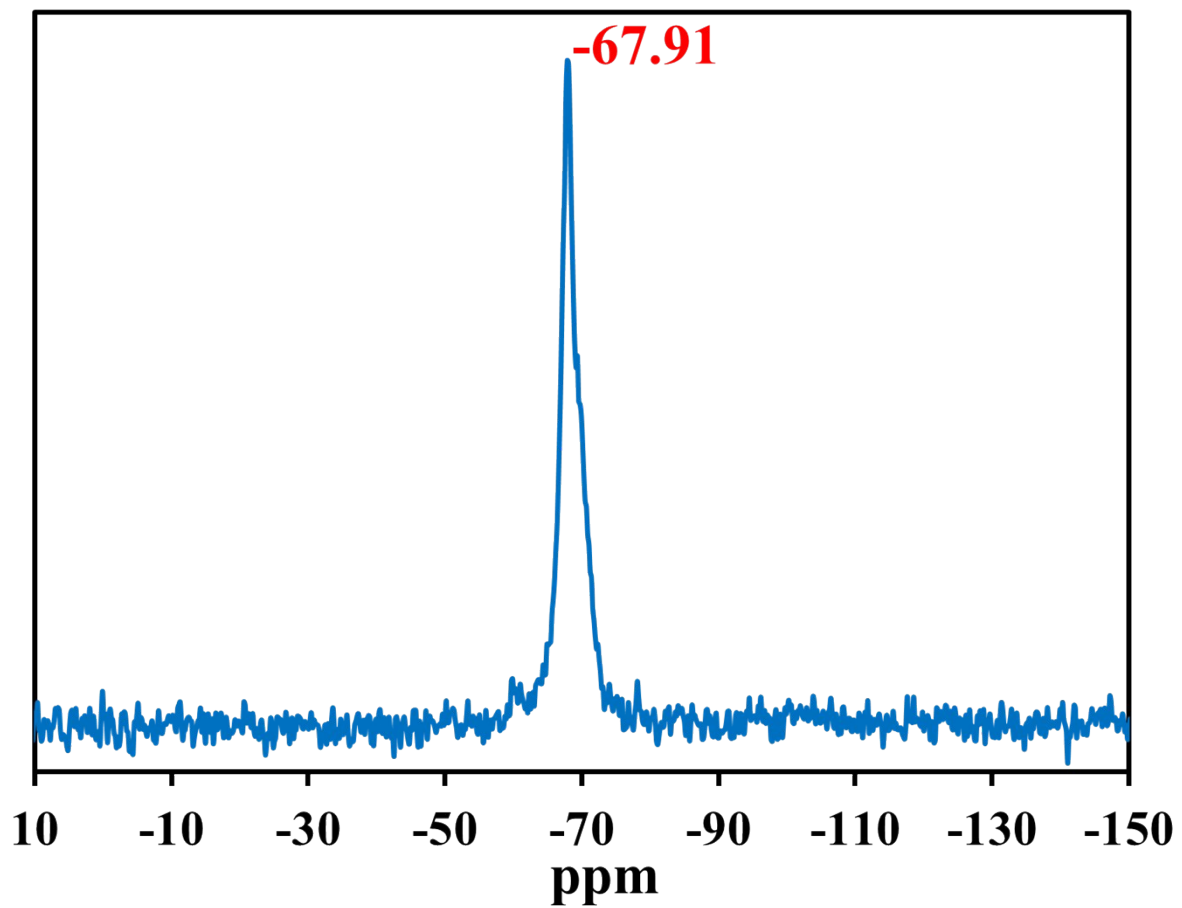

**Figure S4.**  $^{29}\text{Si}$  NMR spectrum of ZIF-POSS.

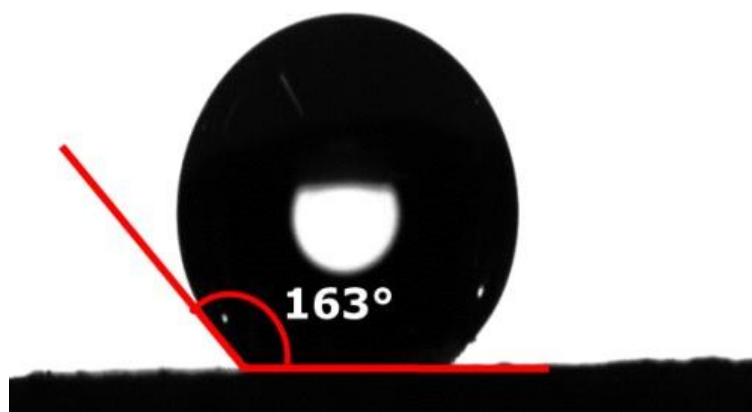

**Figure S5.** Photographs of water contact angle of POSS-NH<sub>2</sub>.

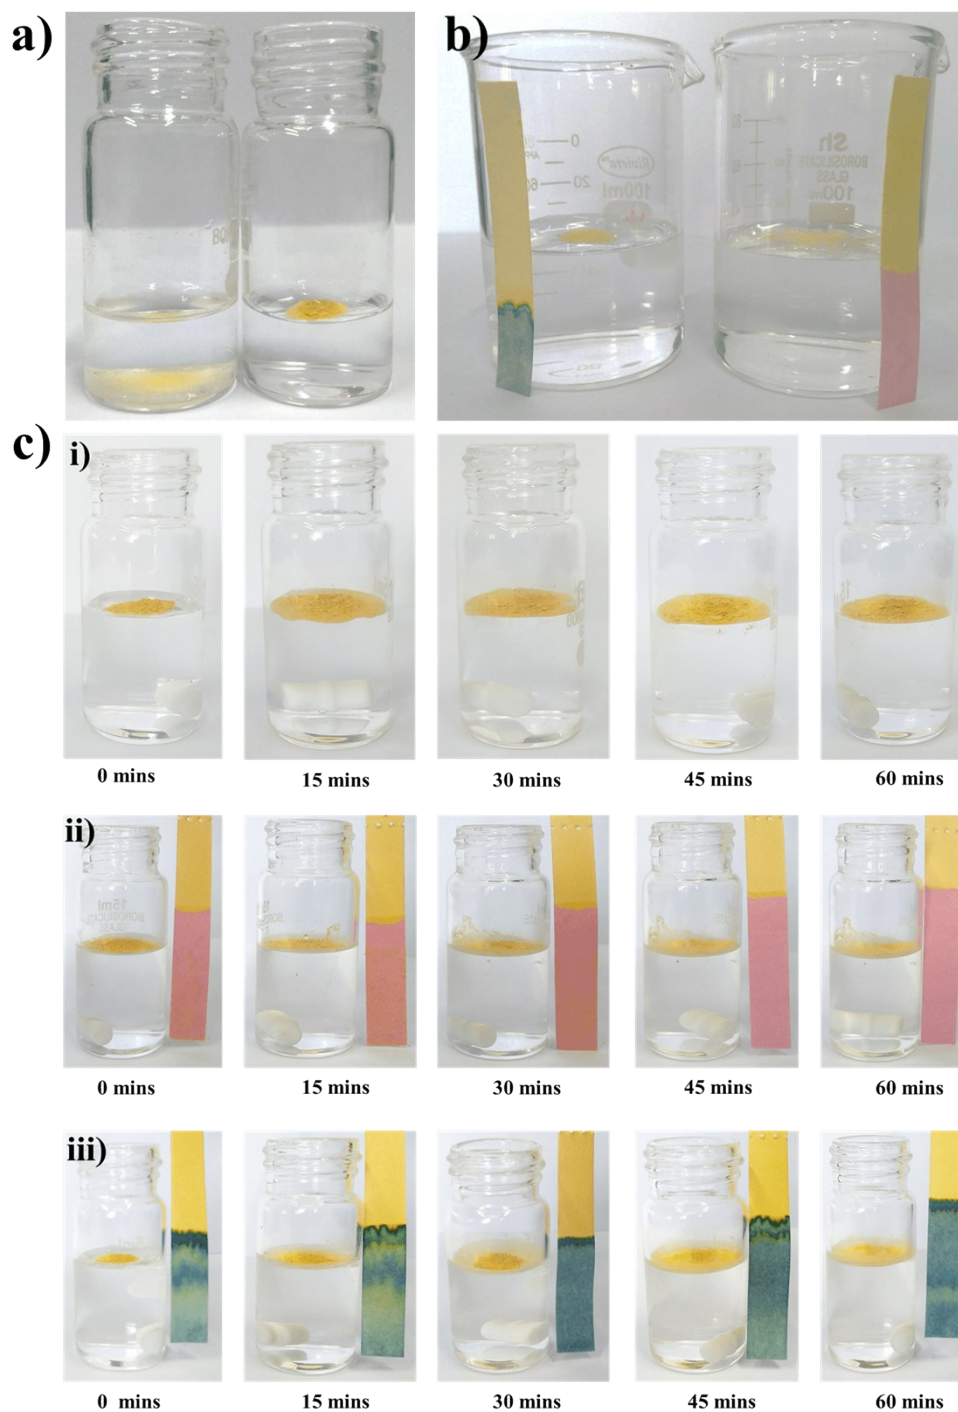

**Figure S6.** (a) Photographs showing the water wetting behaviour of ZIF-90 and ZIF-POSS; (b) Photographs of ZIF-POSS exposing into alkaline and acidic media. (c) ZIF-POSS in (i) water/neutral (ii)acidic and (iii) basic media under stirring (500 rpm) for different times.

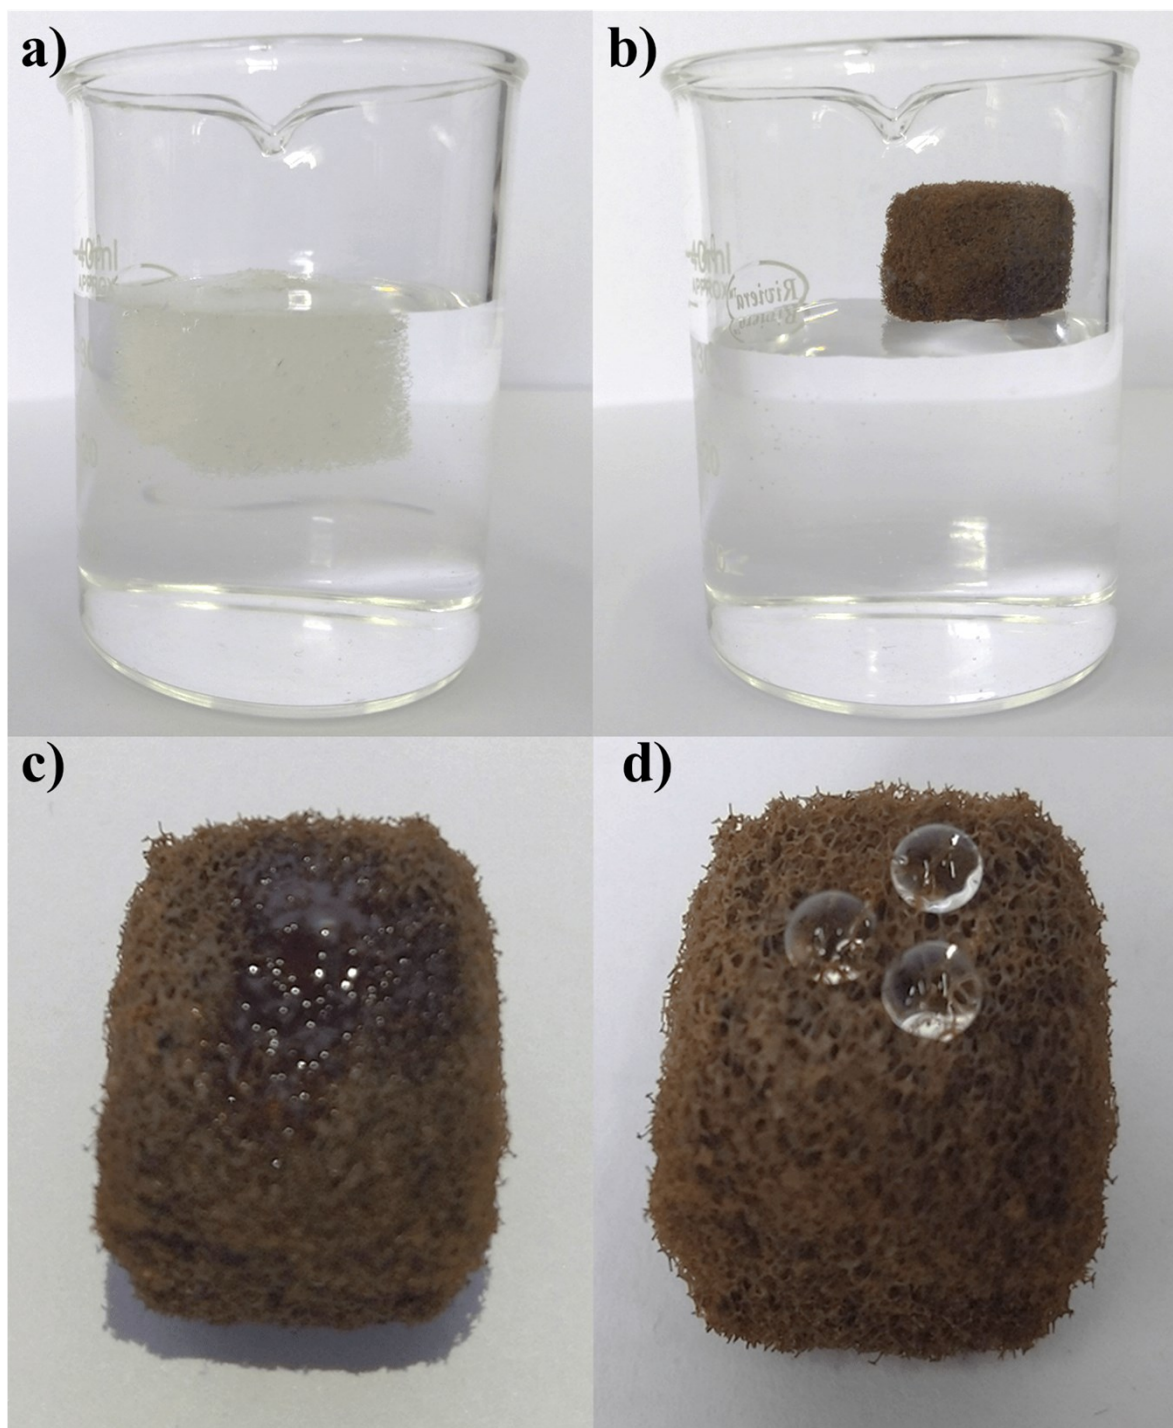

**Figure S7.** The picture of (a) PU sponge in water and (b) ZIF-POSS@PDA@sponge on water; (c) oil droplet on surface of ZIF-POSS@PDA@sponge; (d) water droplet on surface of ZIF-POSS@PDA@sponge.



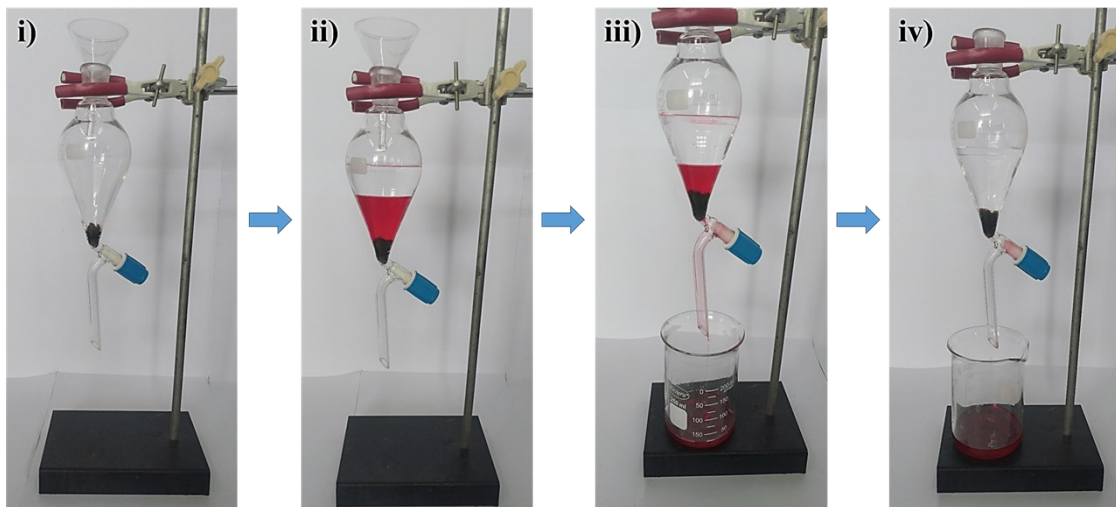

**Figure S8.** Photographs of chloroform-water separation using ZIF-POSS@PDA@sponge.

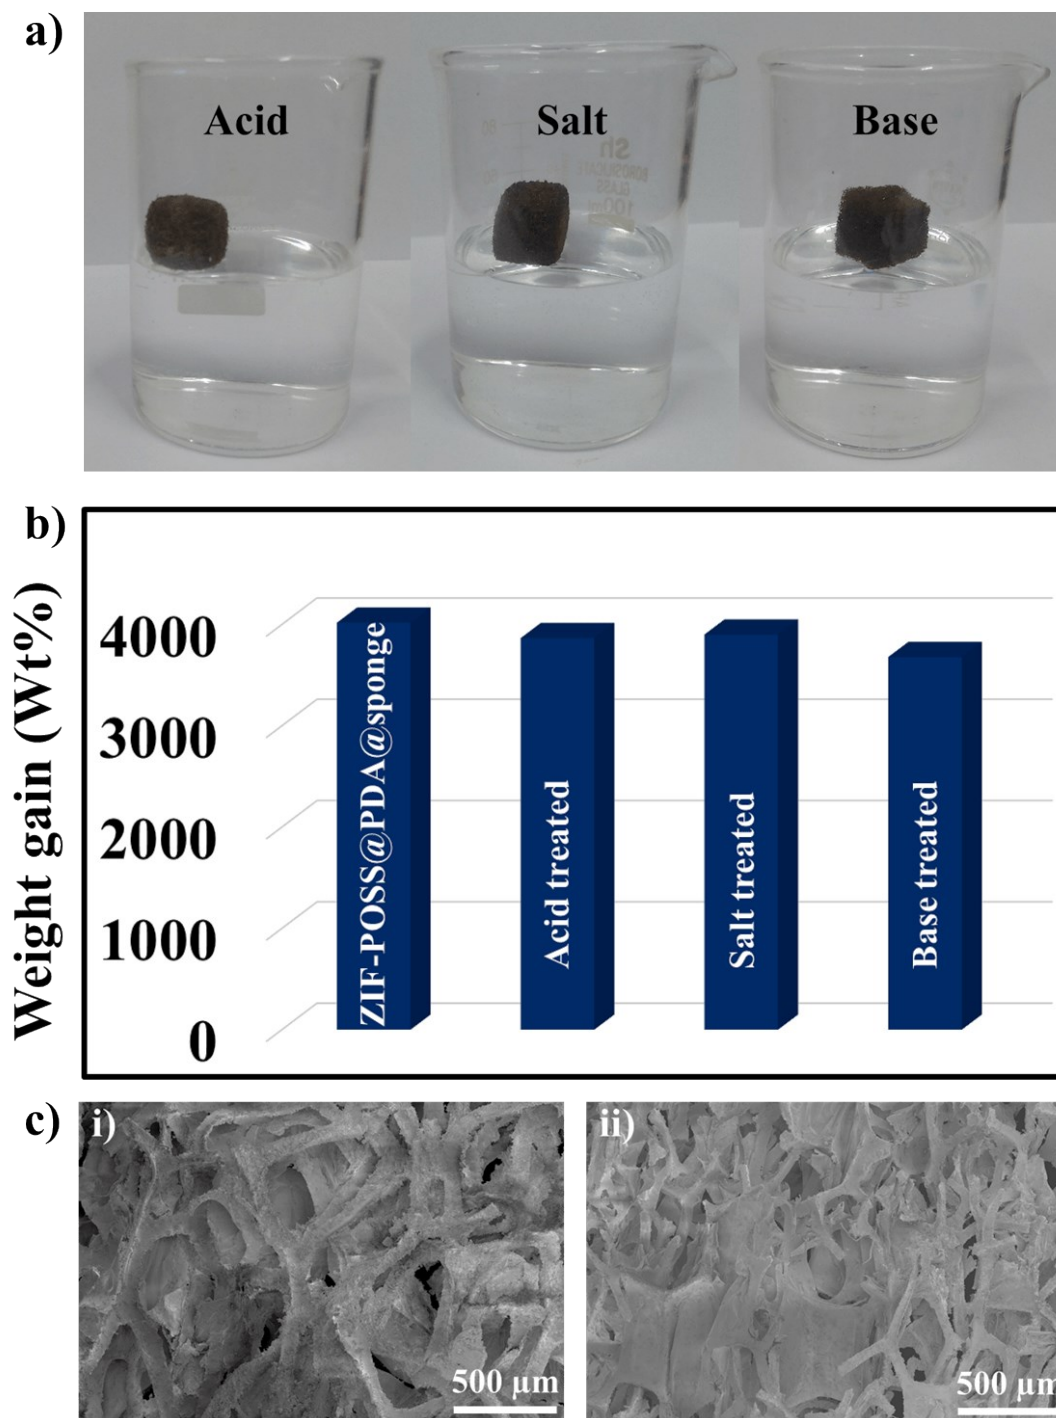

**Figure S9.** (a) Photographs of ZIF-POSS@PDA@sponge exposing to acidic, salt and alkaline media; (b) Testing selective ‘chloroform’ sorption for chemically treated ZIF-POSS@PDA@sponge; (c) SEM images of ZIF-POSS@PDA@sponge after exposing to acidic and alkaline media.

**Table S1.** Absorption capacities and separation efficiency of various POSS and MOF based materials.

| S. No | Materials                    | Contact Angle [°] | Absorption capacities | Separation efficiency | Application                                               | Ref |
|-------|------------------------------|-------------------|-----------------------|-----------------------|-----------------------------------------------------------|-----|
| 1     | P(MMA-SMA-MAPOSS)            | 153               | -                     | 99%                   | Oil–water separation                                      | 1   |
| 2     | TiO <sub>2</sub> -SH-POSS@CT | 157.6             | -                     | 99%                   | Self-cleaning and Oil–water separation                    | 2   |
| 3     | POSS-modified Luffa sponges  | 155               | -                     | -                     | Oil absorption from water                                 | 3   |
| 4     | PIM-1/POSS                   | 155               | -                     | 99.97%                | Oil–Water separation, Cleanup of Oil Soluble Contaminants | 4   |
| 5     | POSS-MPTMS                   | 142               | 280 wt%               | 96%                   | Oil-water separation and Self-cleaning process            | 5   |
| 6     | S-MIL-101                    | 156±1             | 142-369 wt%           | ≥99.5%                | Oil-water separation                                      | 6   |
|       | S-UiO-66                     | 154±1             | 125-281 wt%           |                       |                                                           |     |
|       | S-ZIF-67                     | 151±1             | 122-341 wt%           |                       |                                                           |     |
|       | S-HKUST                      | 155±1             | 118-325 wt%           |                       |                                                           |     |

|    |                            |       |                    |      |                                                                           |              |
|----|----------------------------|-------|--------------------|------|---------------------------------------------------------------------------|--------------|
| 7  | Superhydrophobic<br>ZIF-90 | 152.4 | -                  | 98%  | Bio-alcohols<br>recovered from<br>alcohol/water<br>mixture                | 7            |
| 8  | F-ZIF-<br>90@PDA@sponge    | 159.1 | 1600-4800<br>wt%   | -    | Oil-water<br>separation                                                   | 8            |
| 9  | ZIF-8@<br>rGO@Sponge       | 158   | 1400-2900<br>wt%   | 99%  | Removal<br>of organic<br>solvents and oils<br>from water                  | 9            |
| 10 | MF-ZIF-8@<br>sponge        | 140   | 1000 -<br>3800 wt% | -    | Oil-water<br>separation and<br>Catalysis<br>in a knoevenagel<br>reaction† | 10           |
| 11 | ZIF-POSS                   | 157   | 540–860 wt%.       | >99% | Removal of<br>Organic<br>Pollutants from<br>Water                         | This<br>work |

## References

1. D. Guo, K. Hou, S. Xu, Y. Lin, L. Li, X. Wen and P. Pi, Superhydrophobic superoleophilic stainless steel meshes by spray-coating of a POSS hybrid acrylicpolymer for oil–water separation, *J. Mater. Sci.*, 2018, **53**, 6403–6413.
2. M. Yang, W. Liu, L. Liang, C. Jiang, C. Liu, Y. Xie, H. Shi, F. Zhang and K. Pi, A

- mild strategy to construct superhydrophobic cotton with dual self-cleaning and oil–water separation abilities based on TiO<sub>2</sub> and POSS via thiol-ene click reaction, *Cellulose*, 2020, **27**, 2847–2857.
3. Z. Wang, H. Ma, B. Chu and B. S. Hsiao, Super-hydrophobic modification of porous natural polymer “luffa sponge” for oil absorption, *Polymer*, 2017, **126**, 470–476.
  4. C. Zhang, P. Li and B. Cao, Electrospun Microfibrous Membranes Based on PIM-1/POSS with High Oil Wettability for Separation of Oil–Water Mixtures and Cleanup of Oil Soluble Contaminants, *Ind. Eng. Chem. Res.*, 2015, **54**, 8772–8781.
  5. Y. Deng, D. Han, Y. Y. Deng, Q. Zhang, F. Chen and Q. Fu, Facile one-step preparation of robust hydrophobic cotton fabrics by covalent bonding polyhedral oligomeric silsesquioxane for ultrafast oil/water separation, *Chem. Eng. J.*, 2020, **379**, 122391.
  6. M. L. Gao, S. Y. Zhao, Z. Y. Chen, L. Liu and Z. B. Han, Superhydrophobic/Superoleophilic MOF Composites for Oil–Water Separation, *Inorg. Chem.*, 2019, **58**, 2261–2264.
  7. C. Liu, Q. Liu and A. Huang, Superhydrophobic Zeolitic Imidazolate Framework ZIF-90 with High Steam Stability for Efficient Recover of Bioalcohols, *Chem. Commun.*, 2016, **52**, 3400–3402.
  8. C. Liu and A. Huang, One-step synthesis of the superhydrophobic zeolitic imidazolate framework F-ZIF-90 for efficient removal of oil, *New J. Chem.*, 2018, **42**, 2372–2375.
  9. J. Gu, H. Fan, C. Li, J. Caro and H. Meng, Robust Superhydrophobic/Superoleophilic Wrinkled Microspherical MOF@rGO Composites for Efficient Oil-Water Separation *Angew. Chem. Int. Ed.*, 2019, **58**, 5297-5301.

10. Z. Lei, Y. Deng and C. Wang, Multiphase surface growth of hydrophobic ZIF-8 on melamine sponge for excellent oil/water separation and effective catalysis in a Knoevenagel reaction *J. Mater. Chem. A*, 2018, **6**, 3258–3263.
